# Supplementary material
Source: publisher figshare collection journal article supplement (https://frontiersin.figshare.com/ndownloader/files/12912347)
Supplement: Supplementary file 1 [file 12912347]

Supplementary Material

**Metabolic and Transcriptional Profiles of *Dunaliella viridis* Supplemented with Ammonium Derived from Glutamine**

Jacob Dums1, Colin Murphree1, Naresh Vasani1,2, Danielle Young1,3, Heike Sederoff1*

1 Department of Plant and Microbial Biology, North Carolina State University, Raleigh, North Carolina, United States

2 Memorial Sloan Kettering Cancer Center, New York City, NY, United States

3 Department of Plant Biology, Michigan State University, East Lansing, Michigan, United States

*** Correspondence:**Dr. Heike Sederoff
[hwsedero@ncsu.edu](mailto:hwsedero@ncsu.edu)

# Supplementary Tables

Supplementary Table S2 Shared differentially expressed genes between time points. Numbers represent how many genes are differentially expressed and shared among the different comparisons made between time points for each nitrogen source. This is the numerical output from the Supplementary Figure S3 euler diagrams. Abbreviations: GLN, Glutamine; NO3, nitrate; STAR, nitrogen starvation.

| **Shared Comparisons, Time Point** | **GLN** | **NO3** | **STAR** |
| --- | --- | --- | --- |
| [3 v 27] | 278 | 216 | 460 |
| [3 v 51] | 1110 | 94 | 1147 |
| [27 v 51] | 178 | 9 | 2 |
| [3 v 27] and [27 v 51] | 75 | 15 | 2 |
| [3 v 51] and [27 v 51] | 387 | 32 | 11 |
| [3 v 27] and [3 v 51] and [27 v 51] | 71 | 5 | 13 |
| [3 v 27] and [3 v 51] | 272 | 97 | 1380 |
